# Supplementary material for: Exaptive origins of regulated mRNA decay in eukaryotes
Source: PubMed Central journal article supplement (PMC5031192; doi:10.1002/bies.201600100), 2016-07-20
Supplement: BIES-38-830-s001.pdf [file BIES-38-830-s001.pdf]

**Table S1. Viral TZF-containing proteins showing detectable sequence similarity to human TTP/ZFP36 (blastp, May 2016)**

| Virus                        | Type of genome | Taxon               | Protein                                      | Identity | E value  | Accession      |
|------------------------------|----------------|---------------------|----------------------------------------------|----------|----------|----------------|
| Scale drop disease virus     | dsDNA          | <i>Iridoviridae</i> | ORF_096L                                     | 47%      | 7.00E-12 | YP_009163857.1 |
| Ball python nidovirus        | +RNA           | Nidovirales         | pp1ab replicase polyprotein                  | 34%      | 8.00E-04 | YP_009052475.1 |
| Ball python nidovirus        | +RNA           | Nidovirales         | pp1a replicase polyprotein                   | 31%      | 0.001    | YP_009052476.1 |
| Python nidovirus             | +RNA           | Nidovirales         | pp1a replicase polyprotein                   | 33%      | 0.002    | AI100824.1     |
| Lymphocystis disease virus 1 | dsDNA          | <i>Iridoviridae</i> | Tristetraprolin-like zinc finger protein C3H | 29%      | 0.049    | NP_078696.1    |
